# Supplementary material for: The interplay between vaccination and social distancing strategies affects COVID19 population-level outcomes
Source: PubMed Central journal article supplement (PMC8409608; doi:10.1371/journal.pcbi.1009319), 2021-08-20

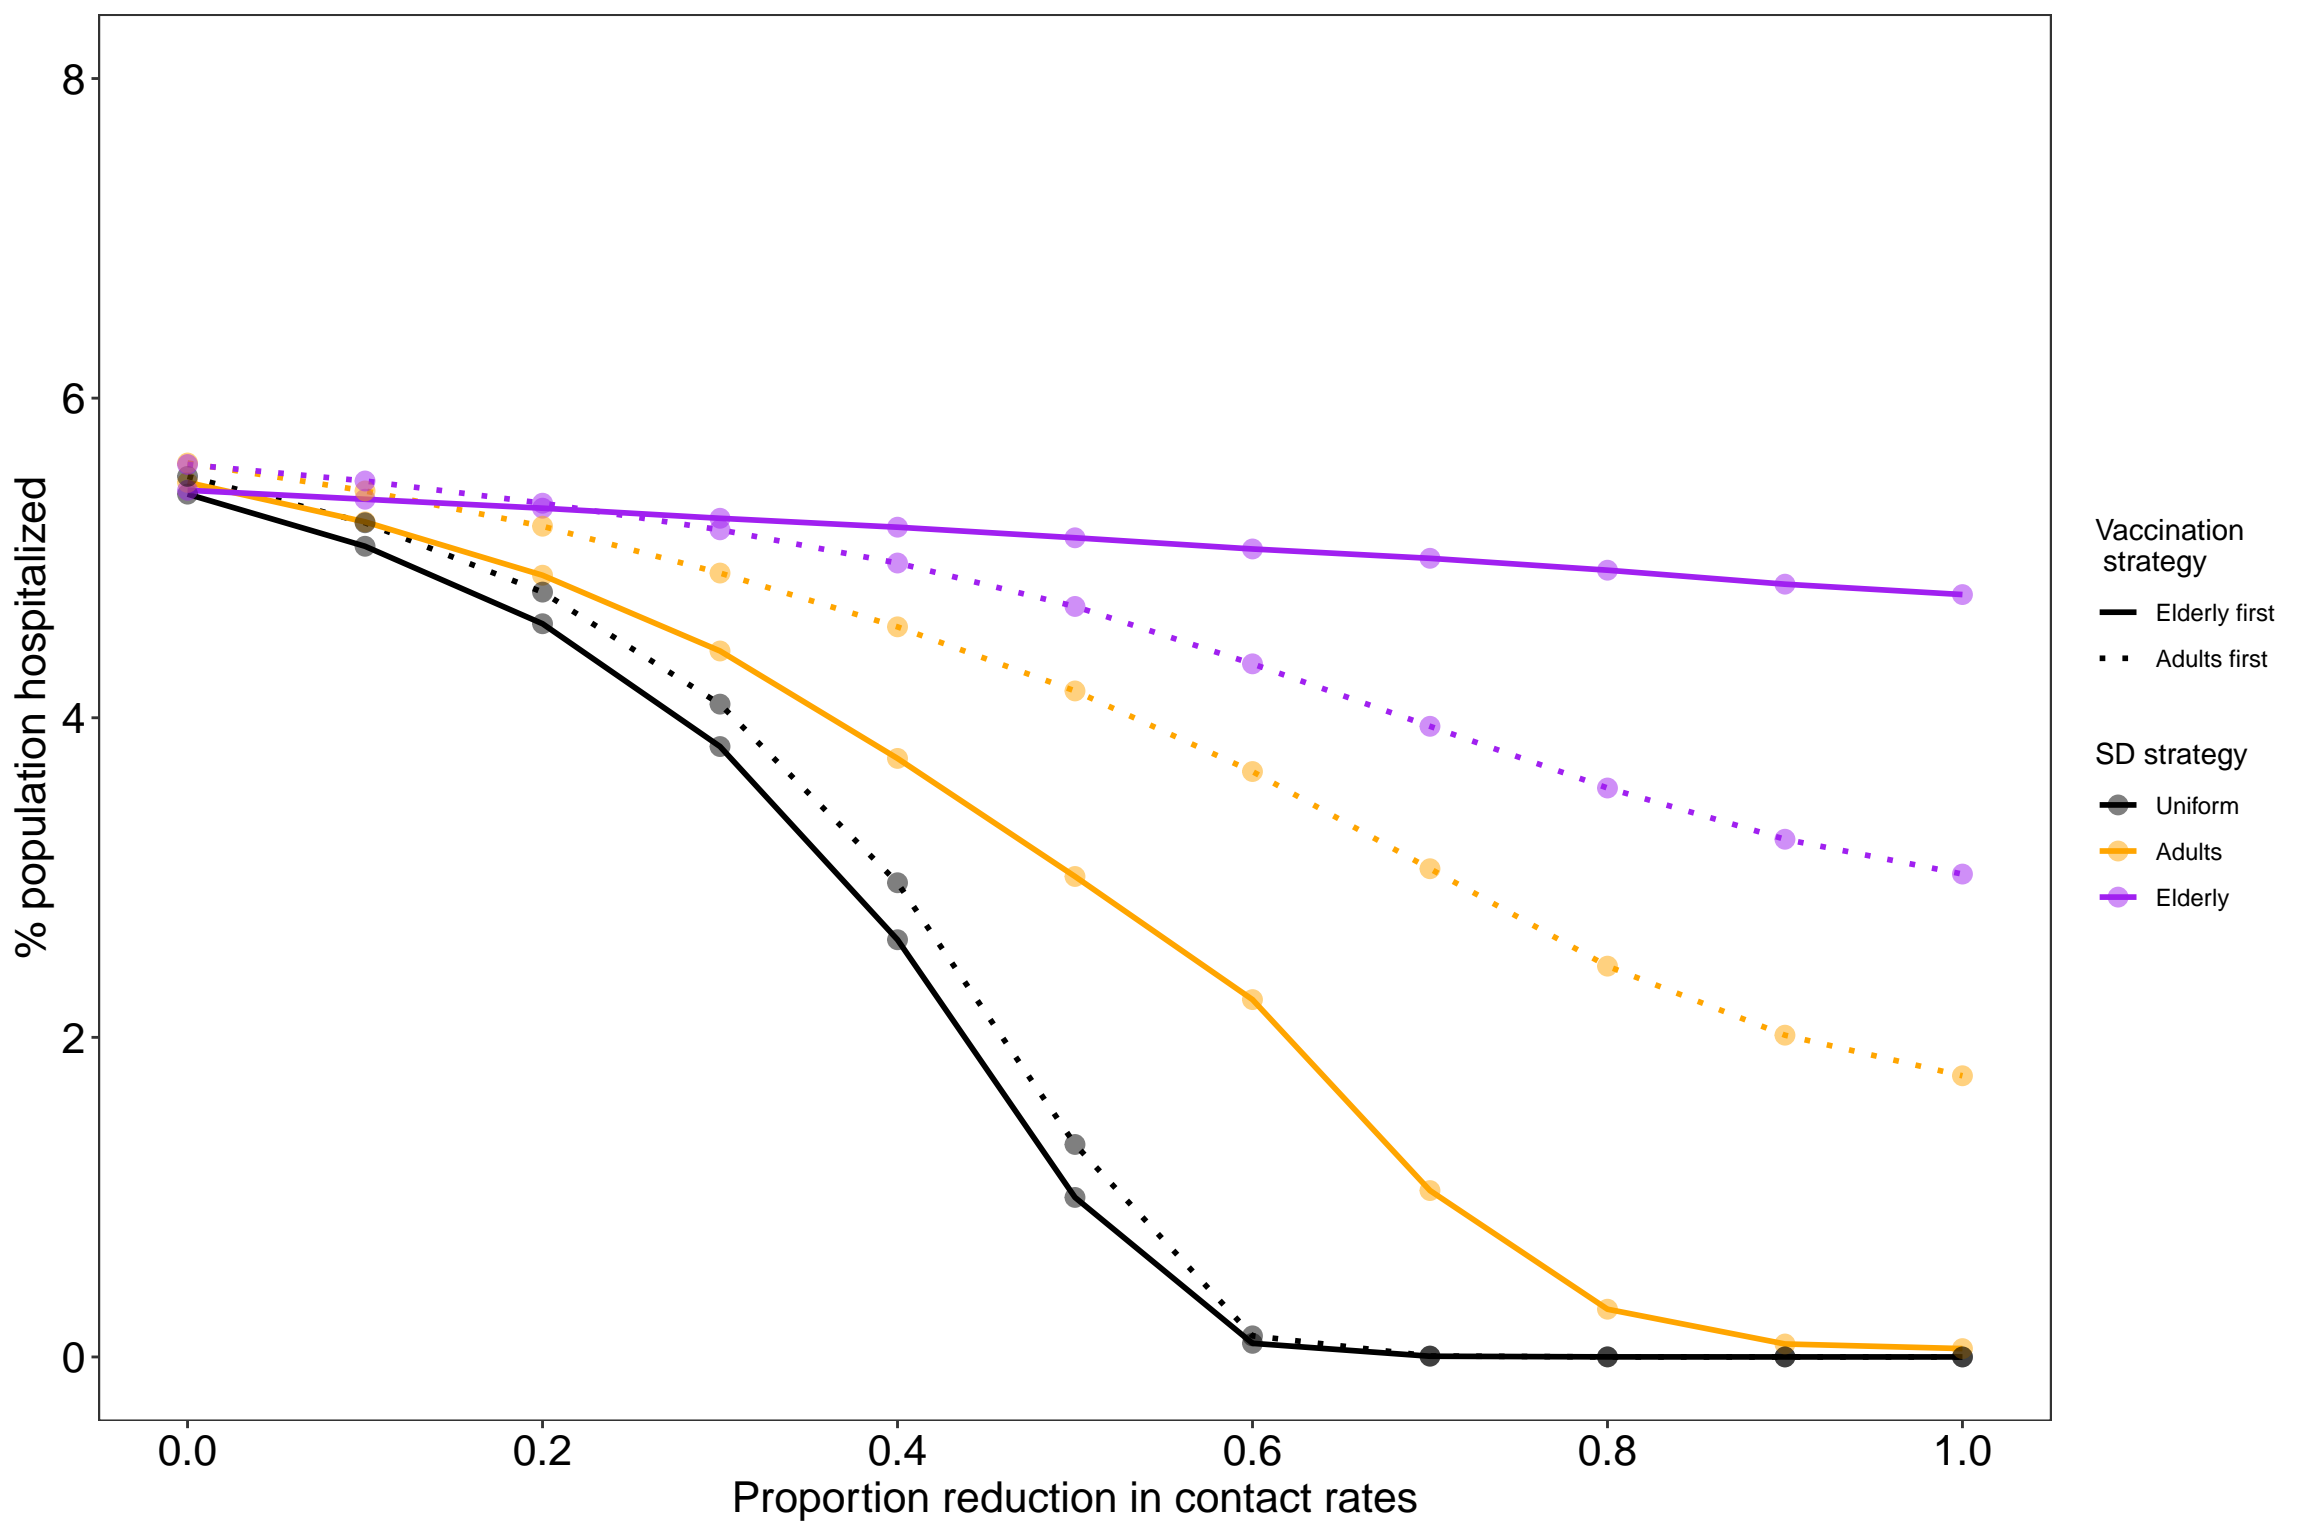

Supplement: pcbi.1009319.s005.pdf [file pcbi.1009319.s005.pdf]
